# Supplementary material
Source: Springer Nature journal article supplement (https://www.springermedizin.de/resource/supplementary/12974_2011_383_MOESM9_ESM.pdf/9601558)

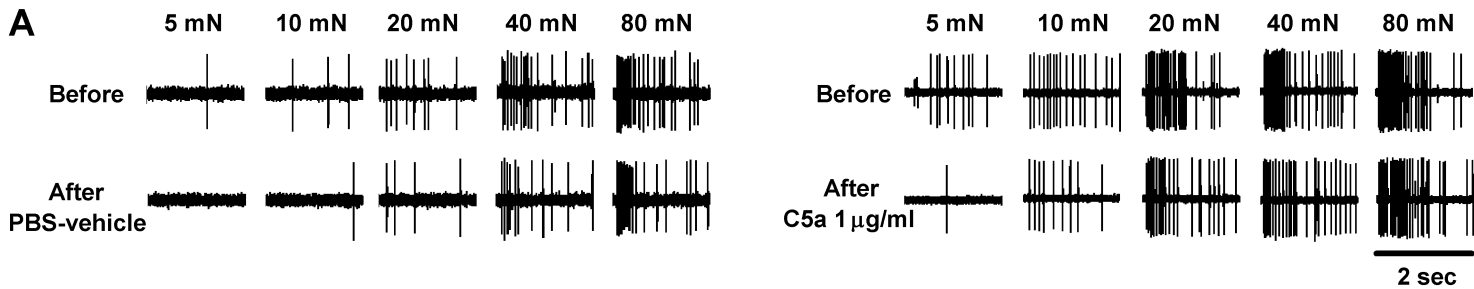

**C-fiber**

<PBS-vehicle>

<C5a 1  $\mu\text{g/ml}$ >

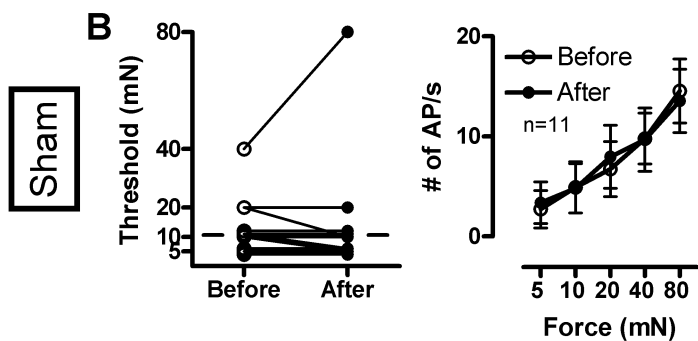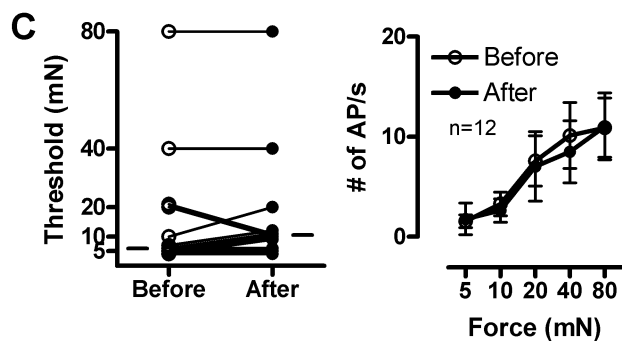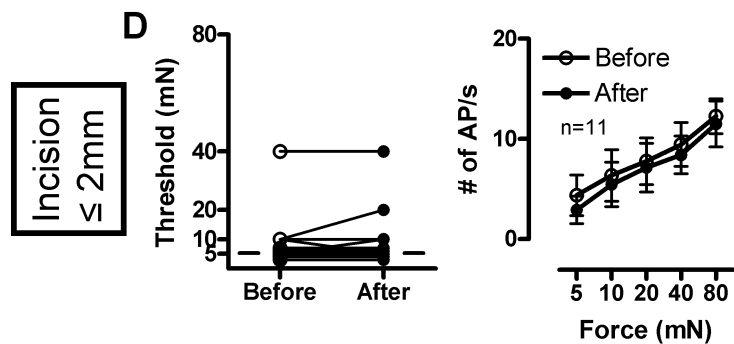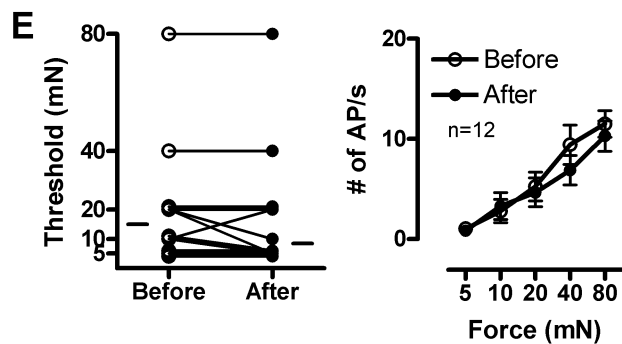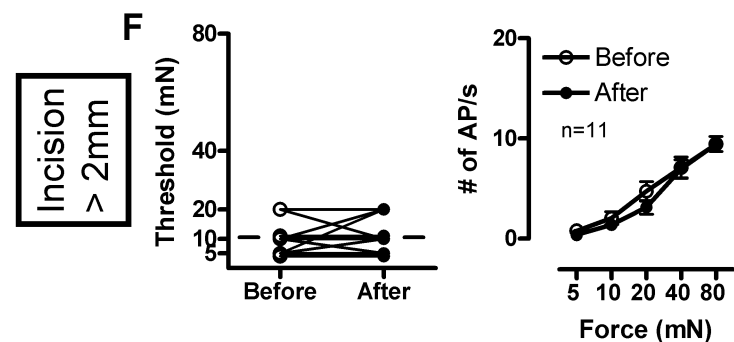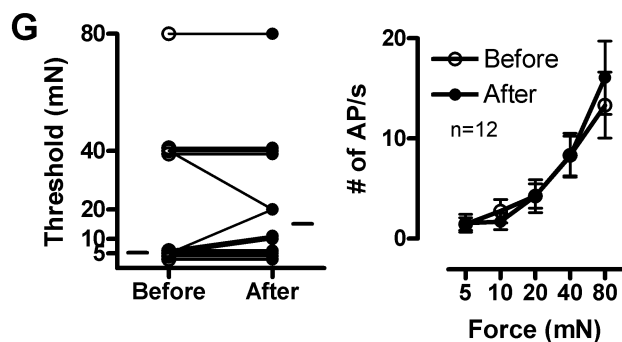

**A-fiber**

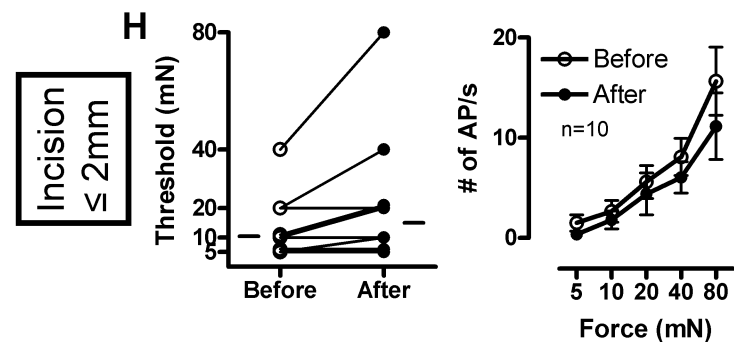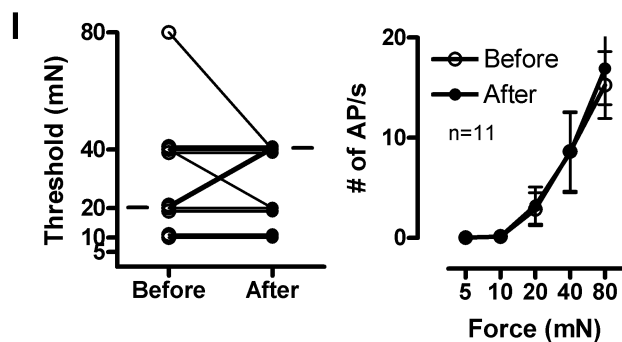

<Threshold>

<Spike>

<Threshold>

<Spike>

Supplement: MOESM9 [file 9601558]
